# Supplementary material for: Thermally stable and tunable broadband near-infrared emission from NIR-I to NIR-II in Bi-doped germanate glass for smart light sources
Source: Royal Society of Chemistry journal article supplement (doi:10.1039/d2tc04890f), 2022-12-11
Supplement: d2tc04890f1.pdf [file d2tc04890f1.pdf]

**Electronic Supplementary Material (ESI) for Journal of Materials Chemistry C.**  
**This journal is © The Royal Society of Chemistry 2019**

## **Thermally Stable and Tunable Broadband Near-infrared Emission from NIR-I to NIR-II Based in Bi-doped Germanate Glass for Smart Light Source**

Weiwei Chen <sup>a</sup>, Xiongjian Huang <sup>a,b</sup>, Quan Dong <sup>a</sup>, Zhihao Zhou <sup>a</sup>, Puxian Xiong <sup>b</sup>,  
Yakun Le <sup>a</sup>, Enhai Song <sup>a</sup>, Jianrong Qiu <sup>c</sup>, Zhongmin Yang <sup>a,b</sup>, and Guoping Dong\* <sup>a</sup>

<sup>a</sup> *The State Key Laboratory of Luminescent Materials and Devices, and Guangdong Engineering Technology Research and Development Center of Special Optical Fiber Materials and Devices, and Guangdong Provincial Key Laboratory of Fiber Laser Materials and Applied Techniques, School of Materials Science and Engineering, South China University of Technology, Guangzhou 510641, P. R. China*

<sup>b</sup> *School of Physics and Optoelectronic, Guangdong Provincial Key Laboratory of Fiber Laser Materials and Applied Techniques, Guangdong Engineering Technology Research and Development Center of Special Optical Fiber Materials and Devices, The State Key Laboratory of Luminescent Materials and Devices, South China University of Technology, Guangzhou 510640, China.*

<sup>c</sup> *State Key Laboratory of Modern Optical Instrumentation, College of Optical Science and Engineering, Zhejiang University, Hangzhou 310027, P. R. China*

*Corresponding authors.*

*E-mail addresses: [dgp@scut.edu.cn](mailto:dgp@scut.edu.cn) (G.P. Dong)*

# Contents

**Fig. S1** Schematic diagram of germanate glass melting process.

**Fig. S2** Emission spectra of Bi-doped germanate glasses with different  $\text{Al}_2\text{O}_3$  content under various excitation wavelength (a)  $\lambda_{\text{ex}} = 520$  nm and (b)  $\lambda_{\text{ex}} = 705$  nm. (c), (d) Corresponding normalized emission spectra of (a) and (b).

**Fig. S3** Emission lifetime of (a) 0Al and (b) 3Al sample.

**Fig. S4** Emission spectra ( $\lambda_{\text{ex}} = 460$  nm) of (a)  $(100-y)\text{GeO}_2-y\text{Bi}_2\text{O}_3$  (yBi,  $y = 0.01, 0.02, 0.03, 0.04, 0.05$ , in mol%) and (b)  $(97-z)\text{GeO}_2-1.5\text{Al}_2\text{O}_3-z\text{Bi}_2\text{O}_3$  (Al-zBi,  $z = 0, 0.01, 0.02, 0.04, 0.06, 0.08, 0.1$ , in mol%) samples. (c), (d) Corresponding normalized emission spectra of (c) and (d).

**Fig. S5** The internal/external quantum efficiency (IQE, EQE) and absorption efficiency (Abs) of 0.01Bi and Al-0.04Bi sample ( $\lambda_{\text{ex}} = 460$  nm).

**Fig. S6** (a) Plotting of  $\ln[(I_0/I) - 1]$  versus  $1/(kT)$  of Al-0.04Bi sample. (b) Fitting results of square of full width at half maximum (FWHM<sup>2</sup>) as a function of  $1/2kT$ .

**Fig. S7** Driven current-dependent emission spectra of the fabricated NIR LED based on (a) 0.01Bi (NIR-LED-I) and (b) Al-0.04Bi (NIR-LED-II) sample measured by a portable fiber spectrometer (NIRQUEST 512, Ocean Optics, NIR, 900-1700 nm).

**Table S1** Performance comparison of Bi-doped high germanate glass developed here with the reported broadband NIR phosphors, glasses and glass ceramics.  $\lambda_{\text{ex}}$  represents the excitation wavelength,  $\lambda_{\text{em}}$  represents the peak emission wavelength and  $I_{150^\circ\text{C}}$  is the retained emission intensity when the temperature is increased from room temperature to 150 °C.

## Supplementary Figures

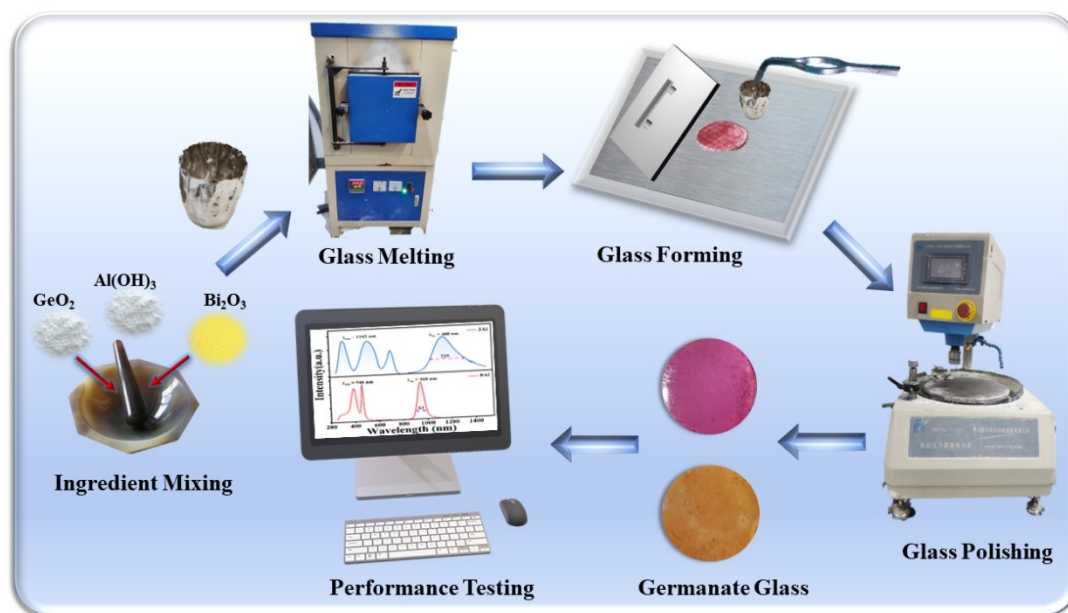

**Fig. S1** Schematic diagram of germanate glass melting process.

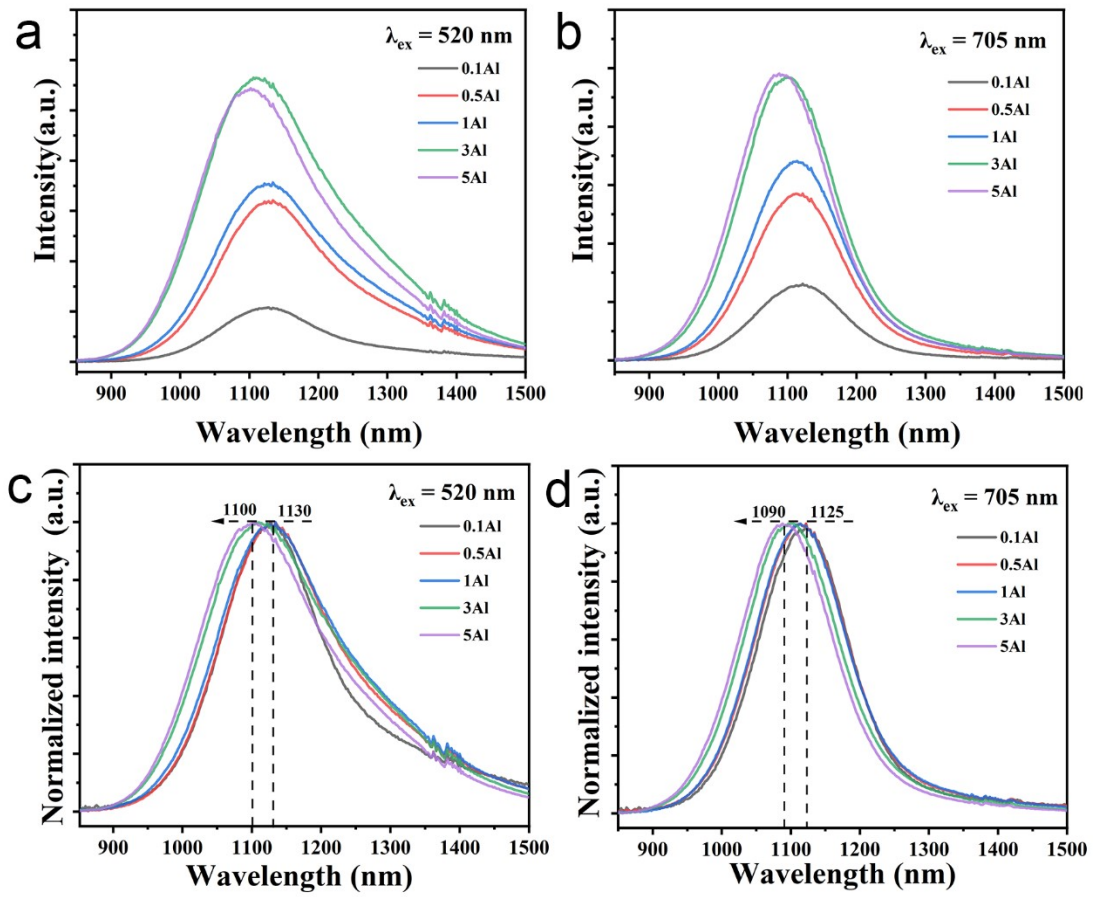

**Fig. S2** Emission spectra of Bi-doped germanate glasses with different  $\text{Al}_2\text{O}_3$  content under various excitation wavelength (a)  $\lambda_{\text{ex}} = 520 \text{ nm}$  and (b)  $\lambda_{\text{ex}} = 705 \text{ nm}$ . (c), (d) Corresponding normalized emission spectra of (a) and (b).

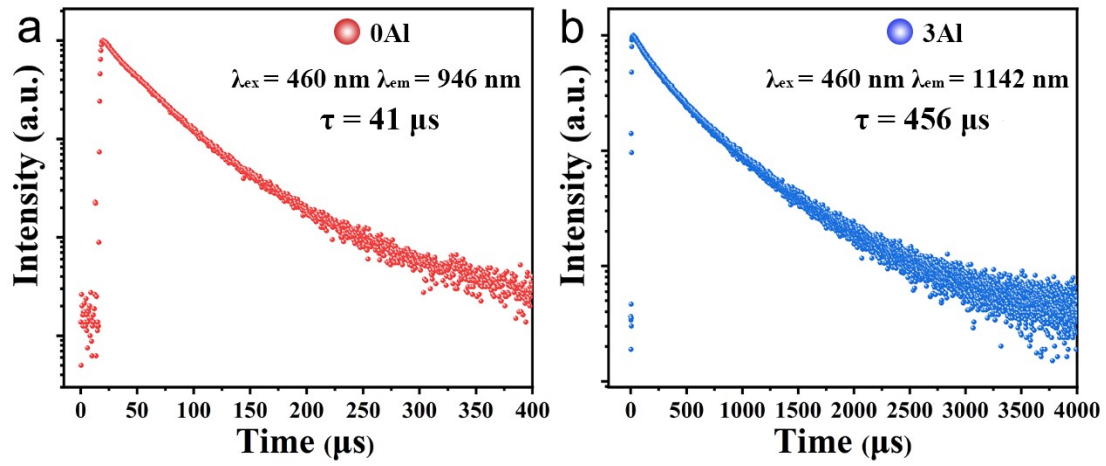

**Fig. S3** Emission lifetime of (a) 0Al and (b) 3Al sample.

The effective fluorescence lifetime  $\tau$  is evaluated through the following equation<sup>S1</sup>:

$$\tau = \frac{\int I(t)t dt}{\int I(t) dt} \quad (1)$$

where  $I(t)$  represents the emission intensity  $I$  at time  $t$ . Under excitation at 460 nm, the obtained lifetimes for the individual emission bands at 946 and 1142 nm of 0Al and 3Al sample are 41 and 456 μs, respectively.

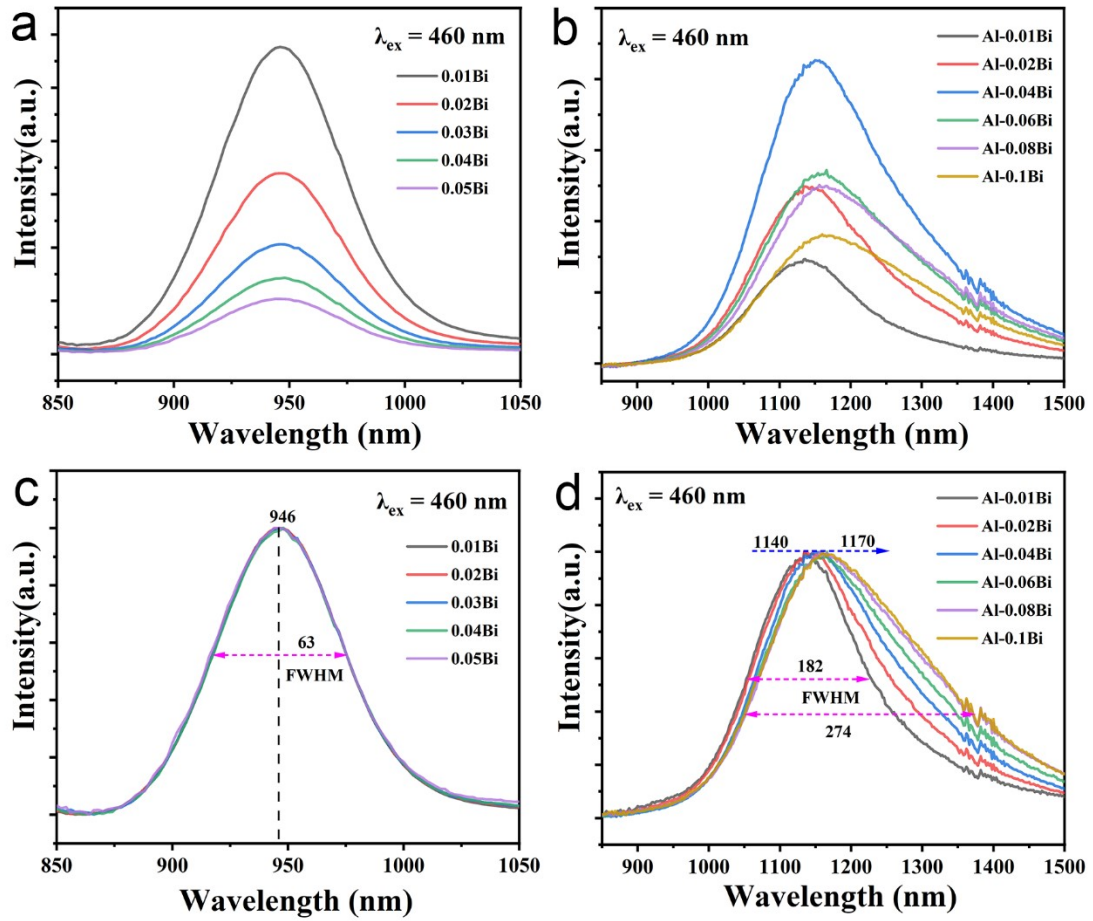

**Fig. S4** Emission spectra ( $\lambda_{ex} = 460$  nm) of (a)  $(100-y)\text{GeO}_2-y\text{Bi}_2\text{O}_3$  ( $y\text{Bi}$ ,  $y = 0.01, 0.02, 0.03, 0.04, 0.05$ , in mol%) and (b)  $(97-z)\text{GeO}_2-3\text{Al}_2\text{O}_3-z\text{Bi}_2\text{O}_3$  ( $\text{Al}-z\text{Bi}$ ,  $z = 0, 0.01, 0.02, 0.04, 0.06, 0.08, 0.1$ , in mol%) samples. (c), (d) Corresponding normalized emission spectra of (c) and (d).

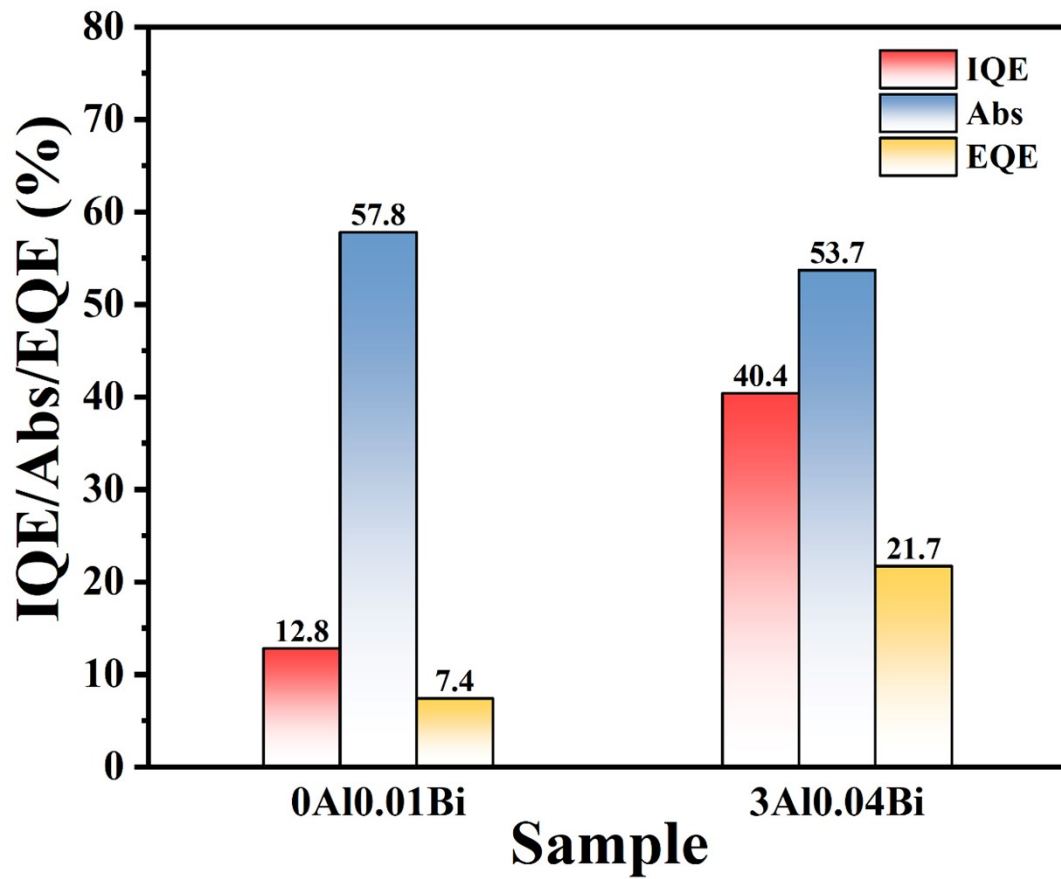

**Fig. S5** The internal/external quantum efficiency (IQE, EQE) and absorption efficiency (Abs) of 0.01Bi and Al-0.04Bi sample ( $\lambda_{\text{ex}} = 460$  nm).

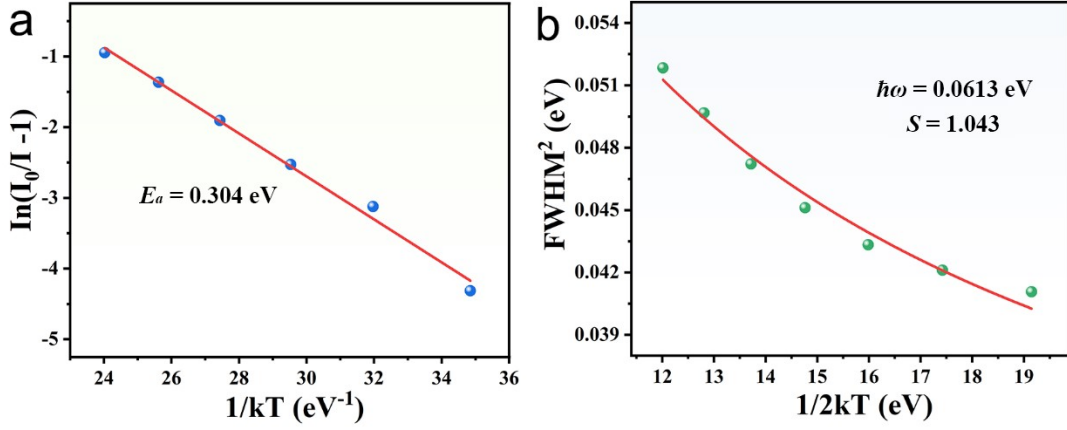

**Fig. S6** (a) Plotting of  $\ln[(I_0/I) - 1]$  versus  $1/(kT)$  of Al-0.04Bi sample. (b) Fitting results of square of full width at half maximum ( $\text{FWHM}^2$ ) as a function of  $1/2kT$ .

The Arrhenius equation is: <sup>S2</sup>

$$I_T = \frac{I_0}{1 + A \exp\left(-\frac{E_a}{kT}\right)} \quad (2)$$

where  $I_T$  and  $I_0$  are the integrated intensity at certain temperature and RT, respectively;  $A$  represents a constant;  $k$  stands for the Boltzmann constant ( $8.617 \times 10^{-5} \text{ eV K}^{-1}$ ). The corresponding  $E_a$  is the activation energy for thermal quenching. It was obtained as the slope of plotting of  $\ln[(I_0/I_T) - 1]$  versus  $1/(kT)$  and equals to 0.304 eV.

The Huang–Rhys factor ( $S$ ) can reflect how strongly electrons couple to phonons and can be obtained by fitting the temperature-dependent full width at FWHM of photoluminescence peaks using the following equation: <sup>S5, S7</sup>

$$\text{FWHM} = 2.36\sqrt{S}\hbar\omega\sqrt{\coth\left(\frac{\hbar\omega}{2kT}\right)} \quad (3)$$

and by simplifying, we can figure out

$$\text{FWHM}^2 = a + \frac{b}{1/2kT} \quad (4)$$

where the  $\hbar\omega$  and  $k$  are the mean phonon energy and Boltzmann's constant,  $a = 5.57 \times S \times (\hbar\omega)^2$  and  $b = 5.57 \times S \times (\hbar\omega) S^2$ . The values of  $\hbar\omega$  and  $S$  are 0.0613 eV and 1.043, respectively.



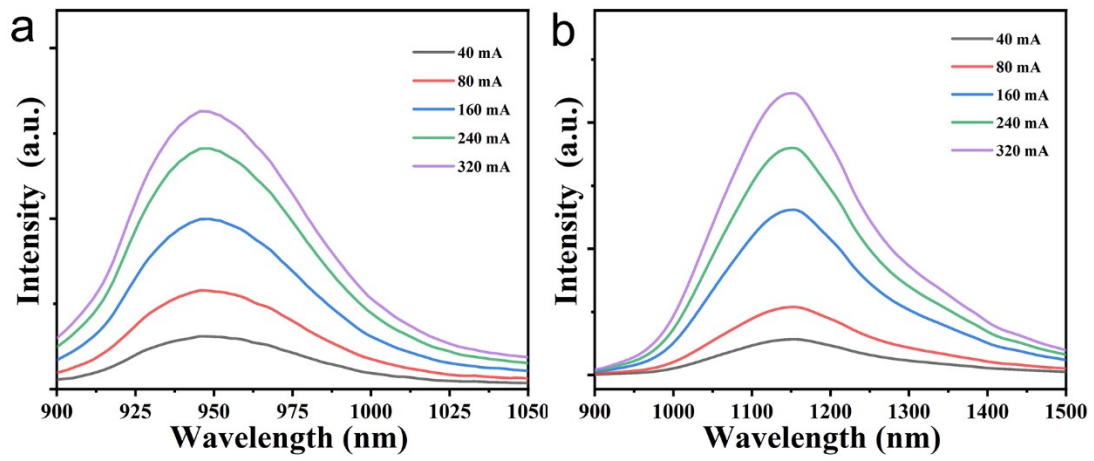

**Fig. S7** Driven current-dependent emission spectra of the fabricated NIR LED based on (a) 0.01Bi (NIR-LED-I) and (b) Al-0.04Bi (NIR-LED-II) sample measured by a portable fiber spectrometer (NIRQUEST 512, Ocean Optics, NIR, 900-1700 nm).

## Supplementary Table

**Table S1** Performance comparison of Bi-doped high germanate glass developed here with the reported broadband NIR phosphors, glasses and glass ceramics.  $\lambda_{\text{ex}}$  represents the excitation wavelength,  $\lambda_{\text{em}}$  represents the peak emission wavelength and  $I_{150^\circ\text{C}}$  is the retained emission intensity when the temperature is increased from room temperature to 150 °C.

| Composition                                                       | $\lambda_{\text{ex}}$<br>(nm) | $\lambda_{\text{em}}$<br>(nm) | FWHM<br>(nm) | $I_{150^\circ\text{C}}$<br>(%) | Device performance | Ref.      |
|-------------------------------------------------------------------|-------------------------------|-------------------------------|--------------|--------------------------------|--------------------|-----------|
| $\text{K}_3\text{LuSi}_2\text{O}_7:\text{Eu}^{2+}$                | 460                           | 740                           | 160          | 59                             | 25.1 mW @ 120 mA   | S3        |
| YCAS:Cr <sup>3+</sup>                                             | 440                           | 760                           | 160          | 90.1                           | 62.6 mW@ 100 mA    | S4        |
| $\text{K}_2\text{NaScF}_6:\text{Cr}^{3+}$                         | 435                           | 765                           | 101          | 89.6                           | 393.7 mW@ 300 mA   | S5        |
| $\text{K}_3\text{ScF}_6:\text{Cr}^{3+}$                           | 432                           | 770                           | 150          | 87.3                           | 139.6 mW@ 600 mA   | S6        |
| $\text{Cs}_2\text{KGaF}_6:\text{Cr}^{3+}$                         | 439                           | 782                           | 110          | 88.7                           | 183.8 mW @ 320 mA  | S7        |
| $\text{Ca}_2\text{LuHf}_2\text{Al}_3\text{O}_{12}:\text{Cr}^{3+}$ | 460                           | 785                           | 145          | 65                             | 46.1 mW@ 100 mA    | S8        |
| $\text{KAlP}_2\text{O}_7:\text{Cr}^{3+}$                          | 450                           | 790                           | 120          | 77                             | 80.9 mW@ 350 mA    | S9        |
| $\text{CaLuScGa}_2\text{Ge}_2\text{O}_{12}:\text{Cr}^{3+}$        | 465                           | 800                           | 150          | 59                             | 1.2 mW@ 100 mA     | S10       |
| $\text{MgAl}_2\text{O}_4:\text{Mn}^{2+}$                          | 450                           | 813                           | 125          | 40                             | 78.4 mW@ 120 mA    | S11       |
| $\text{LiInSi}_2\text{O}_6:\text{Cr}^{3+}$                        | 460                           | 840                           | 143          | 77                             | 51.6 mW@ 100 mA    | S12       |
| Te doped borate glass                                             | 435                           | 904                           | 240          | -                              | 31.6 mW@ 800 mA    | S13       |
| <hr/>                                                             |                               |                               |              |                                |                    |           |
| $\text{MgO}:\text{Cr}^{3+}, \text{Ni}^{2+}$                       | 455                           | 1335                          | 235          | 83                             | 27.4 mW@ 300 mA    | S14       |
| $\text{LiMgPO}_4:\text{Cr}^{3+}, \text{Ni}^{2+}$                  | 450                           | 1380                          | 273          | 45                             | 2.7 mW@ 120 mA     | S15       |
| $\text{Y}_3\text{Al}_2\text{Ga}_3\text{O}_{12}:\text{Ni}^{2+}$    | 400                           | 1450                          | 300          | 71                             | 1.3 mW@ 300 mA     | S16       |
| <hr/>                                                             |                               |                               |              |                                |                    |           |
|                                                                   |                               | 946                           | 63           | 84                             | 21.3 mW@ 160 mA    |           |
|                                                                   |                               |                               |              |                                | 53.2 mW@ 320 mA    |           |
| Bi doped germanate glass                                          | 460                           |                               |              |                                | 90.7 mW@ 160 mA    | This work |
|                                                                   |                               | 1142                          | 225          | 87                             | 179.5 mW@ 320 mA   |           |

## Supplementary References

1. J. Cao, S. Xu, Q. Zhang, Z. Yang and M. Peng, *Adv Opt Mater*, 2018, **6**, 1801059.
2. X. Zhou, W. Geng, J. Li, Y. Wang, J. Ding and Y. Wang, *Adv Opt Mater*, 2020, **8**, 1902003.
3. J. Qiao, G. Zhou, Y. Zhou, Q. Zhang and Z. Xia, *Nat Commun*, 2019, **10**, 5267.
4. G. Zheng, W. Xiao, J. Wu, X. Liu, H. Masai and J. Qiu, *Adv Sci (Weinh)*, 2022, **9**, e2105713.
5. E. Song, H. Ming, Y. Zhou, F. He, J. Wu, Z. Xia and Q. Zhang, *Laser Photonics Rev*, 2020, **15**, 2000410.
6. H. J. Yu, J. Chen, R. Y. Mi, J. Y. Yang and Y. G. Liu, *Chem Eng J*, 2021, **417**, 129271.
7. Z. X. Wu, X. X. Han, J. Wang, Y. Y. Zhou, K. Xing, S. Cao, J. L. Zhao, B. S. Zou and R. S. Zeng, *J Mater Chem C*, 2022, **10**, 10292-10301.
8. L. Zhang, D. Wang, Z. Hao, X. Zhang, G.-h. Pan, H. Wu and J. Zhang, *Adv Opt Mater*, 2019, **7**, 1900185.
9. H. Zhang, J. Zhong, F. Du, L. Chen, X. Zhang, Z. Mu and W. Zhao, *ACS Appl Mater Inter*, 2022, **14**, 11663-11671.
10. B. Bai, P. Dang, D. Huang, H. Lian and J. Lin, *Inorg Chem*, 2020, **59**, 13481-13488.
11. E. Song, X. Jiang, Y. Zhou, Z. Lin, S. Ye, Z. Xia and Q. Zhang, *Adv Opt Mater*, 2019, **7**, 1901105.
12. X. X. Xu, Q. Y. Shao, L. Q. Yao, Y. Dong and J. Q. Jiang, *Chem Eng J*, 2020, **383**, 123108.
13. L. L. Tan, Y. Q. Fu, S. L. Kang, L. Wondraczek, C. G. Lin and Y. Z. Yue, *Photonics Res*, 2022, **10**, 1187-1193.
14. B.-M. Liu, X.-X. Guo, L.-Y. Cao, L. Huang, R. Zou, Z. Zhou and J. Wang, *Chem Eng J*, 2023, **452**, 139313.
15. S. H. Miao, Y. J. Liang, Y. Zhang, D. X. Chen and X. J. Wang, *Adv Mater Technol-Us*, 2022, 2200320, DOI: 10.1002/admt.202200320.
16. L. Yuan, Y. Jin, H. Wu, K. Deng, B. Qu, L. Chen, Y. Hu and R.-S. Liu, *ACS Appl Mater Inter*, 2022, **14**, 4265-4275.
